# Supplementary material
Source: ML conference proceedings conference paper supplement (https://proceedings.neurips.cc/paper_files/paper/2009/hash/cfbce4c1d7c425baf21d6b6f2babe6be-Abstract.html)
Supplement: Supplementary file 1 [file cfbce4c1d7c425baf21d6b6f2babe6be-Supplemental.zip]

---

# Relax then Compensate: On Max-Product Belief Propagation and More (Appendix)

---

**Arthur Choi**  
Computer Science Department  
University of California, Los Angeles  
Los Angeles, CA 90095  
aychoi@cs.ucla.edu

**Adnan Darwiche**  
Computer Science Department  
University of California, Los Angeles  
Los Angeles, CA 90095  
darwiche@cs.ucla.edu

First, we restate Equations and Theorems from the main paper.

Consider the REC-BP condition for a single equivalence constraint relaxed:

$$\text{c-map}(X_i = x) = \text{c-map}(X_j = x) = \theta(X_i = x) + \theta(X_j = x) + \gamma \quad (1)$$

**Proposition 1** *Let  $\text{map}(\cdot)$  denote the MAP values of a model  $\mathcal{M}$ , and let  $\text{c-map}(\cdot)$  denote the MAP values of a compensation that results from relaxing an equivalence constraint  $X_i \equiv X_j$  that split  $\mathcal{M}$  into two independent sub-models. Then the compensation has parameters satisfying Equation 1 iff  $\text{c-map}(X_i = x) = \text{c-map}(X_j = x) = \text{map}(X_i = x, X_j = x) + \gamma$ .*

Consider the REC-I condition for a single equivalence constraint relaxed:

$$\text{c-map}(X_i = x) = \text{c-map}(X_j = x) = 2 \cdot [\theta(X_i = x) + \theta(X_j = x)] \quad (2)$$

**Proposition 2** *Let  $\text{map}(\cdot)$  denote the MAP values of a model  $\mathcal{M}$ , and let  $\text{c-map}(\cdot)$  denote the MAP values of a compensation that results from relaxing an equivalence constraint  $X_i \equiv X_j$  in  $\mathcal{M}$ . If  $\text{c-map}(\cdot)$  has valid configurations and scaled values, then  $\text{c-map}(\cdot)$  satisfies Equation 2.*

Consider the REC-BP condition for a  $k$  equivalence constraints relaxed:

$$\text{c-map}(X_i = x) = \text{c-map}(X_j = x) = \theta(X_i = x) + \theta(X_j = x) + \gamma \quad (3)$$

**Theorem 1** *Let  $\text{map}(\cdot)$  denote the MAP values of a model  $\mathcal{M}$ , and let  $\text{c-map}(\cdot)$  denote the MAP values of a compensation that results from relaxing enough equivalence constraints  $X_i \equiv X_j$  in  $\mathcal{M}$  to render it fully disconnected. Then a compensation whose parameters satisfy Equation 3 has values  $\exp\{\text{c-map}(X_i = x)\}$  that correspond to the max-marginals of a fixed-point of max-product belief propagation run on  $\mathcal{M}$ , and vice-versa.*

Consider REC-I condition for a  $k$  equivalence constraints relaxed:

$$\text{c-map}(X_i = x) = \text{c-map}(X_j = x) = (1 + k)[\theta(X_i = x) + \theta(X_j = x)] \quad (4)$$

**Theorem 2** *Let  $\text{map}(\cdot)$  denote the MAP values of a model  $\mathcal{M}$ , and let  $\text{c-map}(\cdot)$  denote the MAP values of a compensation that results from relaxing  $k$  equivalence constraints  $X_i \equiv X_j$ . If the compensation has parameters satisfying either Eqs. 3 or 4, and if  $\mathbf{x}^*$  is an optimal assignment for the compensation that is also valid, then: (1)  $\mathbf{x}^*$  is optimal for the model  $\mathcal{M}$ , and (2)  $\frac{1}{1+k} \text{c-map}^* = \text{map}^*$ .*

**Theorem 3** *Let  $\text{map}(\cdot)$  denote the MAP values of a model  $\mathcal{M}$ , and let  $\text{c-map}(\cdot)$  denote the MAP values of a compensation that results from relaxing  $k$  equivalence constraints  $X_i \equiv X_j$ . If the compensation has parameters satisfying Equation 4, then  $\text{map}^* \leq \frac{1}{1+k} \text{c-map}^*$ .*

**Theorem 4** *Let  $\text{map}(\cdot)$  denote the MAP values of a model  $\mathcal{M}$ , and let  $\text{c-map}(\cdot)$  denote the MAP values of a compensation that results from relaxing  $k$  equivalence constraints  $X_i \equiv X_j$ . If the compensation has parameters satisfying Eq. 4, and if  $\mathbf{z}$  is a partial assignment that sets the same sign to variables  $X_i$  and  $X_j$ , for any equivalence constraint  $X_i \equiv X_j$  deleted, then:  $\text{map}(\mathbf{z}) \leq \frac{1}{1+k} \text{c-map}(\mathbf{z})$ .*

## A Proofs

**Proof of Proposition 1** Let  $\text{c-map}_i(X_i)$  and  $\text{c-map}_j(X_j)$  denote a compensation's MAP values in subnetworks  $\mathcal{M}_i$  and  $\mathcal{M}_j$ . Then:

$$\text{c-map}_i(X_i) = \text{r-map}_i(X_i) + \theta(X_i) \quad \text{and} \quad \text{c-map}_j(X_j) = \text{r-map}_j(X_j) + \theta(X_j).$$

Using Equation 1, we find

$$\begin{aligned} \text{c-map}(X_i=x) &= \text{c-map}_i(X_i=x) + \text{c-map}_j^* \\ &= \text{r-map}_i(X_i=x) + \theta(X_i=x) + \text{c-map}_j^* = \theta(X_i=x) + \theta(X_j=x) + \gamma \\ \text{c-map}(X_j=x) &= \text{c-map}_i^* + \text{c-map}_j(X_j=x) \\ &= \text{c-map}_i^* + \text{r-map}_j(X_j=x) + \theta(X_j=x) = \theta(X_i=x) + \theta(X_j=x) + \gamma \end{aligned}$$

thus we have that

$$\theta(X_j=x) = \text{r-map}_i(X_i=x) + \text{c-map}_j^* - \gamma \quad \text{and} \quad \theta(X_i=x) = \text{c-map}_i^* + \text{r-map}_j(X_j=x) - \gamma.$$

Substituting back in, we find that

$$\begin{aligned} \text{c-map}(X_i=x) &= \text{c-map}(X_j=x) \\ &= \text{r-map}_i(X_i=x) + \text{r-map}_j(X_j=x) + \text{c-map}_1^* + \text{c-map}_2^* - \gamma = \text{map}(X_i=x, X_j=x) + \gamma \end{aligned}$$

since  $\text{r-map}_i(X_i=x) + \text{r-map}_j(X_j=x) = \text{map}(X_i=x, X_j=x)$  and  $\text{c-map}_1^* + \text{c-map}_2^* = \text{c-map}^*$  and  $\gamma = \frac{1}{2}\text{c-map}^*$ . We can reverse the steps, for the other direction.  $\square$

**Proof of Proposition 2** It suffices to show  $\theta(X_i=x) + \theta(X_j=x) = \frac{\kappa-1}{\kappa} \cdot \text{c-map}(X_i=x, X_j=x)$ . Now,

$$\begin{aligned} \text{c-map}(X_i=x, X_j=x) &= \text{map}(X_i=x, X_j=x) + [\theta(X_i=x) + \theta(X_j=x)] \\ &= \kappa^{-1} \cdot \text{c-map}(X_i=x, X_j=x) + [\theta(X_i=x) + \theta(X_j=x)] \end{aligned}$$

$$\text{so } \theta(X_i=x) + \theta(X_j=x) = (1 - \frac{1}{\kappa}) \cdot \text{c-map}(X_i=x, X_j=x) = \frac{\kappa-1}{\kappa} \cdot \text{c-map}(X_i=x, X_j=x). \quad \square$$

**Proof of Theorem 1** Analogous to the correspondence of the ED-BP algorithm and sum-product belief propagation, shown in [1].  $\square$

**Lemma 1** Let  $\text{map}(\cdot)$  denote the MAP values of a model  $\mathcal{M}$ , and let  $\text{c-map}(\cdot)$  denote the MAP values of a compensation that results from relaxing  $k$  equivalence constraints  $X_i \equiv X_j$ . If the compensation has parameters satisfying Equation 4, and if  $\tilde{\mathbf{x}}$  is a complete assignment that is also valid, then  $\text{map}(\tilde{\mathbf{x}}) \leq \frac{1}{1+k} \text{c-map}(\tilde{\mathbf{x}})$ , with equality if  $\tilde{\mathbf{x}}$  is also optimal for  $\text{c-map}(\cdot)$ .

**Proof** First, we have

$$\text{c-map}(\tilde{\mathbf{x}}) = \text{map}(\tilde{\mathbf{x}}) + \sum_{X_i \equiv X_j} [\theta(X_i=x) + \theta(X_j=x)] = \text{map}(\tilde{\mathbf{x}}) + \sum_{X_i \equiv X_j} \frac{1}{1+k} \text{c-map}(X_i=x).$$

Note that  $x$  is the state assumed by  $X_i$  and  $X_j$  in assignment  $\tilde{\mathbf{x}}$ . Since  $\text{c-map}(X_i=x) \geq \text{c-map}(\tilde{\mathbf{x}})$ ,

$$\text{c-map}(\tilde{\mathbf{x}}) \geq \text{map}(\tilde{\mathbf{x}}) + \sum_{X_i \equiv X_j} \frac{1}{1+k} \text{c-map}(\tilde{\mathbf{x}}) = \text{map}(\tilde{\mathbf{x}}) + \frac{k}{1+k} \text{c-map}(\tilde{\mathbf{x}})$$

and thus  $\frac{1}{1+k} \text{c-map}(\tilde{\mathbf{x}}) \geq \text{map}(\tilde{\mathbf{x}})$ . In the case where  $\text{c-map}(\tilde{\mathbf{x}}) = \text{c-map}^*$ , we have that  $\text{c-map}(X_i=x) = \text{c-map}(\tilde{\mathbf{x}})$  for all  $X_i \equiv X_j$ , so we have  $\text{map}(\tilde{\mathbf{x}}) = \frac{1}{1+k} \text{c-map}(\tilde{\mathbf{x}})$ .  $\square$

**Proof of Theorem 2** Note first in a REC-BP compensation, from Equation 3, that

$$\theta(X_i=x) + \theta(X_j=x) = \text{c-map}(X_i=x) - \frac{k}{1+k} \text{c-map}^* = \text{c-map}^* - \frac{k}{1+k} \text{c-map}^* = \frac{1}{1+k} \text{c-map}^*$$

When we decompose  $\text{c-map}(\mathbf{x}^*)$  into the original factors, i.e.,  $\text{map}(\mathbf{x}^*)$ , and the auxiliary parameters  $\theta(X_i=x) + \theta(X_j=x)$ :

$$\begin{aligned} \text{c-map}(\mathbf{x}^*) &= \text{map}(\mathbf{x}^*) + \sum_{X_i \equiv X_j} [\theta(X_i=x) + \theta(X_j=x)] \\ &= \text{map}(\mathbf{x}^*) + \sum_{X_i \equiv X_j} \frac{1}{1+k} \text{c-map}^* = \text{map}(\mathbf{x}^*) + \frac{k}{1+k} \text{c-map}^* \end{aligned}$$

and  $\frac{1}{1+k} \text{c-map}(\mathbf{x}^*) = \text{map}(\mathbf{x}^*)$ . Similarly, for a REC-I compensation, since  $\theta(X_i = x) + \theta(X_j = x) = \frac{1}{1+k} \text{c-map}(X_i = x) = \frac{1}{1+k} \text{c-map}^*$ .

We now want to show that  $\mathbf{x}^*$  must be optimal for  $\text{map}(\cdot)$ . Suppose for contradiction that there is an assignment  $\hat{\mathbf{x}}$  such that  $\text{map}(\hat{\mathbf{x}}) > \text{map}(\mathbf{x}^*)$ . Then:

$$\begin{aligned}
\text{c-map}(\hat{\mathbf{x}}) &= \text{map}(\hat{\mathbf{x}}) + \sum_{X_i \equiv X_j} [\theta(X_i = x) + \theta(X_j = x)] \\
&= \text{map}(\hat{\mathbf{x}}) + \sum_{X_i \equiv X_j} [\text{c-map}(X_i = x) - \frac{k}{1+k} \text{c-map}^*] \\
&\geq \text{map}(\hat{\mathbf{x}}) + \sum_{X_i \equiv X_j} [\text{c-map}(\hat{\mathbf{x}}) - \frac{k}{1+k} \text{c-map}^*] \\
&= \text{map}(\hat{\mathbf{x}}) + k \cdot \text{c-map}(\hat{\mathbf{x}}) - \frac{k^2}{1+k} \text{c-map}^* \\
&> \text{map}(\mathbf{x}^*) + k \cdot \text{c-map}(\hat{\mathbf{x}}) - \frac{k^2}{1+k} \text{c-map}^* \\
&= \frac{1}{1+k} \text{c-map}^* + k \cdot \text{c-map}(\hat{\mathbf{x}}) - \frac{k^2}{1+k} \text{c-map}^* \\
&= k \cdot \text{c-map}(\hat{\mathbf{x}}) + \frac{1-k^2}{1+k} \text{c-map}^* = k \cdot \text{c-map}(\hat{\mathbf{x}}) + (1-k) \cdot \text{c-map}^*
\end{aligned}$$

and thus  $\text{c-map}(\hat{\mathbf{x}}) > \text{c-map}^*$  which contradicts the optimality of  $\text{c-map}^*$ .

We know for a REC-I compensation, that  $\mathbf{x}^*$  must be optimal for  $\text{map}(\cdot)$ . Otherwise it would not be optimal for  $\text{c-map}(\cdot)$ , by Lemma 1.  $\square$

**Proof of Theorem 3** Let  $\mathbf{x}^*$  be an optimal assignment for  $\text{map}(\cdot)$ . Since  $\mathbf{x}^*$  must also be valid, we have by Lemma 1 that  $\text{map}^* = \text{map}(\mathbf{x}^*) \leq \frac{1}{1+k} \text{c-map}(\mathbf{x}^*) \leq \frac{1}{1+k} \text{c-map}^*$ .  $\square$

**Proof of Theorem 4** We have that

$$\begin{aligned}
\text{map}(\tilde{\mathbf{z}}) &= \max_{\tilde{\mathbf{x}} \sim \tilde{\mathbf{z}}} \text{map}(\tilde{\mathbf{x}}) \leq \max_{\tilde{\mathbf{x}} \sim \tilde{\mathbf{z}}} \frac{1}{1+k} \text{c-map}(\tilde{\mathbf{x}}) \\
&\leq \max_{\mathbf{x} \sim \tilde{\mathbf{z}}} \frac{1}{1+k} \text{c-map}(\mathbf{x}) = \frac{1}{1+k} \text{c-map}(\tilde{\mathbf{z}})
\end{aligned}$$

where the first inequality follows from Lemma 1.  $\square$

**Proposition 3** Let  $\text{map}(\cdot)$  denote the MAP values of a model  $\mathcal{M}$ , and let  $\text{c-map}(\cdot)$  denote the MAP values of a compensation that results from relaxing a single equivalence constraint  $X_i \equiv X_j$ . If the compensation has parameters satisfying either Eqs. 1 or 2, and if  $\mathbf{x}^*$  is an optimal assignment for the compensation that is also valid, then:

$$\text{map}^* \leq \frac{1}{2} \text{c-map}^* \leq \text{r-map}^*.$$

**Proof** The inequality  $\text{map}^* \leq \frac{1}{2} \text{c-map}^*$  is implied by Theorem 3. The inequality  $\frac{1}{2} \text{c-map}^* \leq \text{r-map}^*$ , follows trivially if  $\text{c-map}^* = \text{c-map}(X_i = x, X_j = x)$ , for some state  $x$ , since  $\frac{1}{2} \text{c-map}^* = \text{map}^*$  in this case, and  $\text{map}^* \leq \text{r-map}^*$ . Then assume that if  $\text{c-map}^* = \text{c-map}(X_i = x_i, X_j = x_j)$ , then  $x_i \neq x_j$ . It must then be that  $\text{c-map}(X_i = x_i) = \text{c-map}(X_i = x_i, X_j = x_j) = \text{c-map}(X_j = x_j)$ , so there are at least 2 states  $x$  where the optimal MAP value  $\text{c-map}^*$  is achieved. Select  $s$  pairs of optimal assignments  $X_i = x_i, X_j = x_j$  where  $X_i$  and  $X_j$  are set to a particular state  $x$  exactly once (like  $X_i = x_1, X_j = x_2$  and  $X_i = x_2, X_j = x_3$  and  $X_i = x_3, X_j = x_1$ ). We know such a selection exists. Suppose, without loss of generality, that  $X_i = x_1, X_j = x_2$  is an optimal assignment (we can relabel states). Then there must be an optimal assignment  $X_i = x_2, X_j = x$  for some state  $x$ , since  $\text{c-map}(X_i = x_2) = \text{c-map}(X_j = x_2)$ . If  $x = x_1$  then we are done. Otherwise, we can assume w.l.o.g. that  $x = x_3$ , and we can repeat the above reasoning.

Using these  $s$  assignments  $X_i = x_i, X_j = x_j$ , we have that:

$$\begin{aligned}
s \cdot \text{c-map}^* &= \sum_{X_i=x_i, X_j=x_j} \text{c-map}(X_i=x_i, X_j=x_j) \\
&= \sum_{X_i=x_i, X_j=x_j} \text{r-map}(X_i=x_i, X_j=x_j) + \theta(X_i=x_i) + \theta(X_j=x_j) \\
&= \left[ \sum_{X_i=x_i, X_j=x_j} \text{r-map}(X_i=x_i, X_j=x_j) \right] + \left[ \sum_{x_i=x_j} \theta(X_i=x_i) + \theta(X_j=x_j) \right] \\
&= \left[ \sum_{X_i=x_i, X_j=x_j} \text{r-map}(X_i=x_i, X_j=x_j) \right] + \left[ \sum_{x_i=x_j} \frac{1}{2} \text{c-map}(X_i=x_i) \right] \\
&= \left[ \sum_{X_i=x_i, X_j=x_j} \text{r-map}(X_i=x_i, X_j=x_j) \right] + \left[ \sum_{x_i=x_j} \frac{1}{2} \text{c-map}^* \right] \\
&= \left[ \sum_{X_i=x_i, X_j=x_j} \text{r-map}(X_i=x_i, X_j=x_j) \right] + \frac{s}{2} \text{c-map}^*
\end{aligned}$$

and thus

$$\frac{1}{2} \text{c-map}^* = \frac{1}{s} \sum_{X_i=x_i, X_j=x_j} \text{r-map}(X_i=x_i, X_j=x_j) \leq \frac{1}{s} \sum_{X_i=x_i, X_j=x_j} \text{r-map}^* = \text{r-map}^*$$

as desired. □

## References

- [1] Arthur Choi and Adnan Darwiche. An edge deletion semantics for belief propagation and its practical impact on approximation quality. In *AAAI*, pages 1107–1114, 2006.
